# Supplementary material for: Brief communication: The Impact of Interannual Melt Supply Variability on Greenland Ice Sheet Moulin Inputs
Source: Copernicus journal article supplement (doi:10.5194/tc-2022-180), 2022-10-27
Supplement: Supplementary file 1 [file tc-2022-180-supplement.pdf]

Table S1: Domain-averaged RACMO2.3p2 surface melt and melt season dates, defined as the first and last instance of three consecutive days of melt

| Year | Melt (m w. e.) | Melt season dates     | Melt season duration (days) |
|------|----------------|-----------------------|-----------------------------|
| 2011 | 2.72           | 4 June – 30 August    | 87                          |
| 2012 | 3.03           | 26 May – 25 August    | 91                          |
| 2015 | 1.65           | 13 June – 9 September | 88                          |
| 2016 | 2.81           | 9 May – 2 September   | 116                         |

Table S2: SaDS model parameters.

| Parameter  | Description                              | Value         | Units                                   |
|------------|------------------------------------------|---------------|-----------------------------------------|
| $\alpha_s$ | Distributed sheet flow exponent          | $\frac{5}{4}$ | -                                       |
| $\beta_s$  | Distributed sheet flow exponent          | $\frac{3}{2}$ | -                                       |
| $\alpha_c$ | Channel flow exponent                    | $\frac{5}{3}$ | -                                       |
| $\beta_c$  | Channel flow exponent                    | $\frac{3}{2}$ | -                                       |
| $k_s$      | Distributed sheet hydraulic conductivity | 1.0           | $\text{m}^{(2-\alpha_s)} \text{s}^{-1}$ |
| $k_c$      | Channel hydraulic conductivity           | 15            | $\text{m}^{(2-\alpha_c)} \text{s}^{-1}$ |
| $r$        | Channel width-to-depth ratio             | 5.0           | -                                       |
| $\zeta$    | Exchange ratio                           | 0.2           | -                                       |
| dt         | Timestep                                 | 20            | s                                       |
| $\rho_i$   | Density of ice                           | 910           | $\text{kg m}^{-3}$                      |

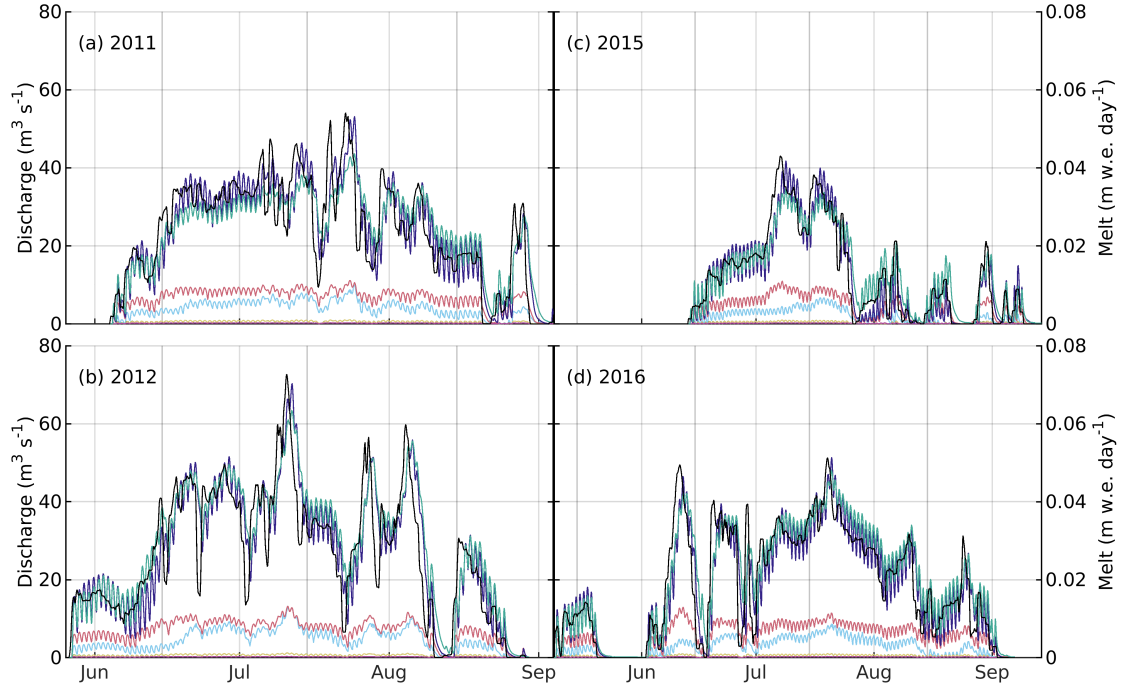

Figure S1: Discharge into moulin in (a) 2011, (b) 2012, (c) 2015, and (d) 2016, with colours as in Figure 1. Light colours show instantaneous diurnal amplitude, and bold colours show the seven day moving average.

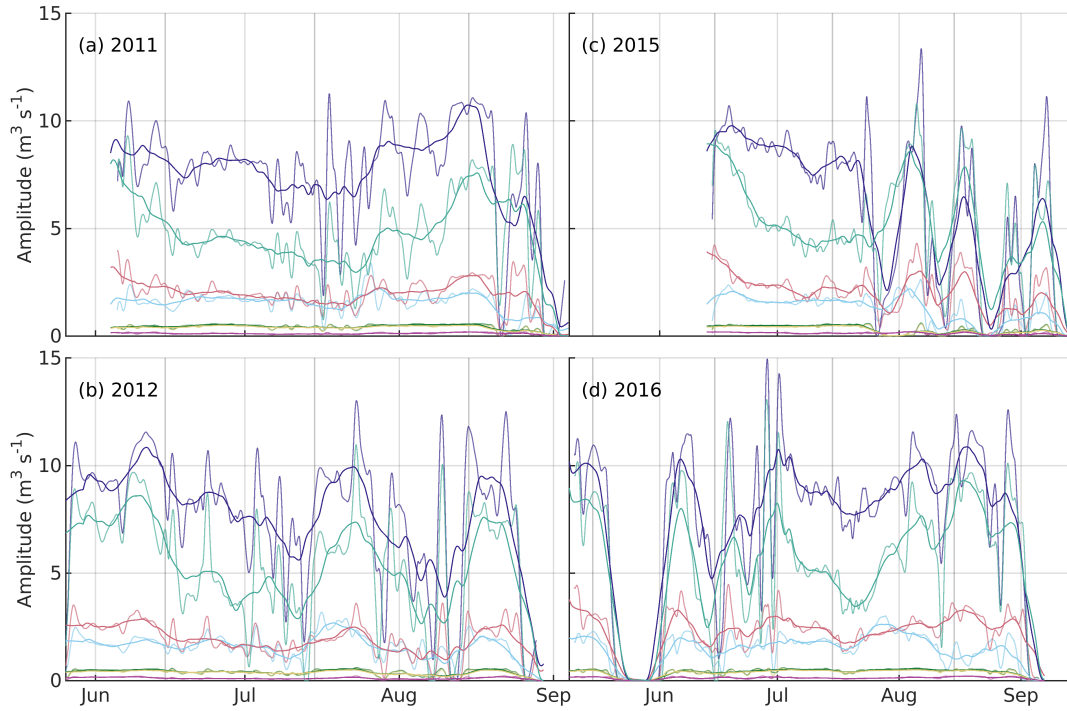

Figure S2: Diurnal amplitude of discharge into moulin in (a) 2011, (b) 2012, (c) 2015, and (d) 2016, with colours as in Figure 1.

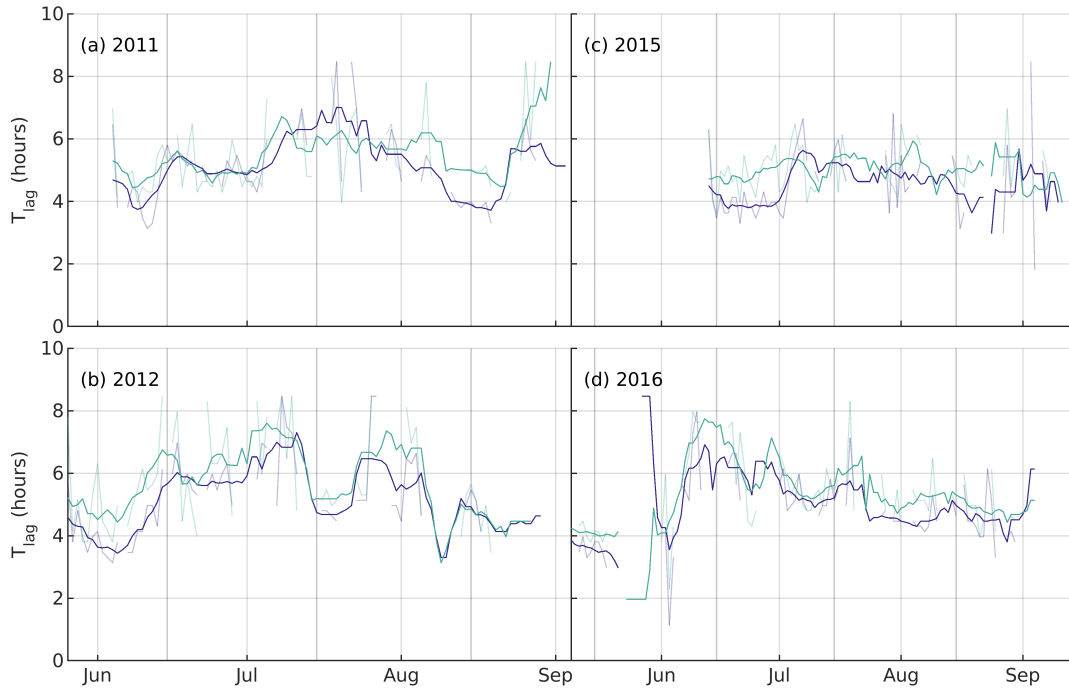

Figure S3: Lag time of moulin inputs for the two moulins with the highest input rate, with colours as in Figure S1.

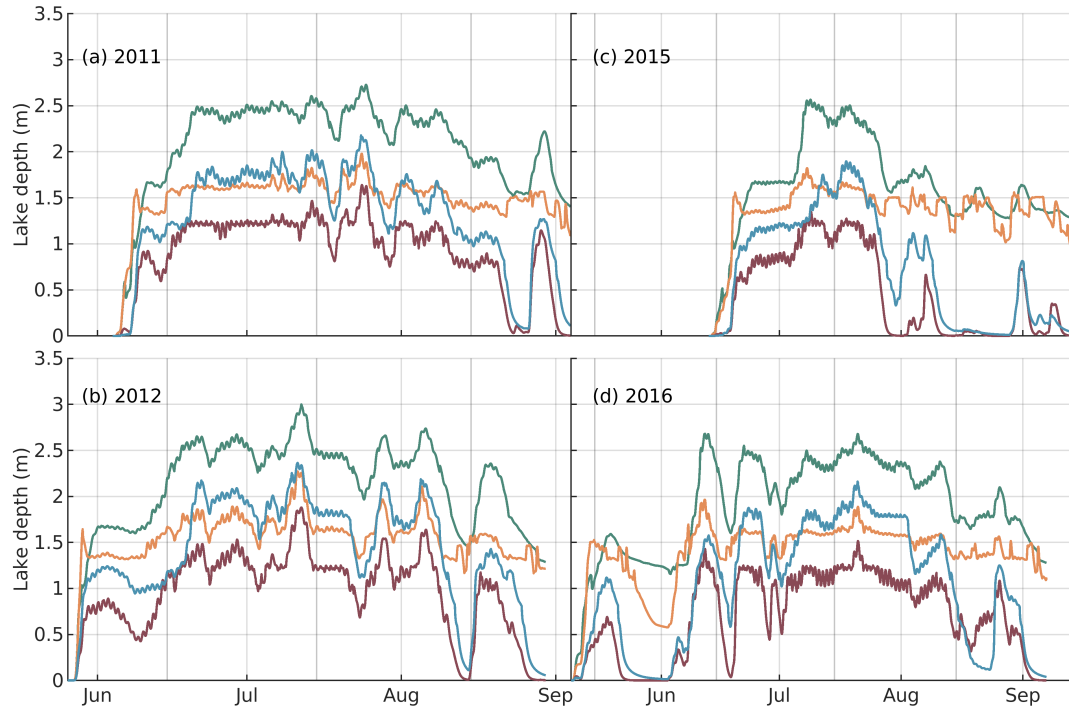

Figure S4: Supraglacial lake water depths for lakes L1 (green, elevation 1215 m), L2 (gold, elevation 1218 m), L3 (red, elevation 1276 m), and L4 (blue, elevation 1387 m).

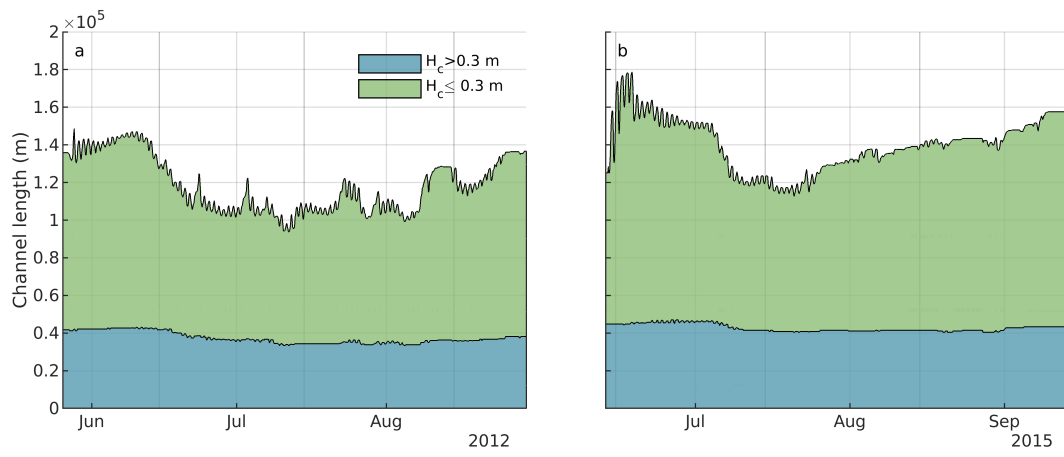

Figure S5: Cumulative length of incised supraglacial channels, partitioned between large (incision depth  $H_c > 0.3 \text{ m}$ ) and small channels ( $H_c \leq 0.3 \text{ m}$ ), for (a) 2012 and (b) 2015.
